# Supplementary material for: Shift in GATA3 functions, and GATA3 mutations, control progression and clinical presentation in breast cancer
Source: Springer Nature journal article supplement (doi:10.1186/s13058-014-0464-0), 2014-11-20

**Figure S1: GATA3 induces Bcl2, DACH1 and THSD4 in luminal breast cancer lines**

Relative expression levels of specified genes were measured 48 hours following siRNA transfections relative to Ctrl siRNA transfected cells, both normalized to beta-actin. Results of three pooled GATA3 siRNAs are shown.

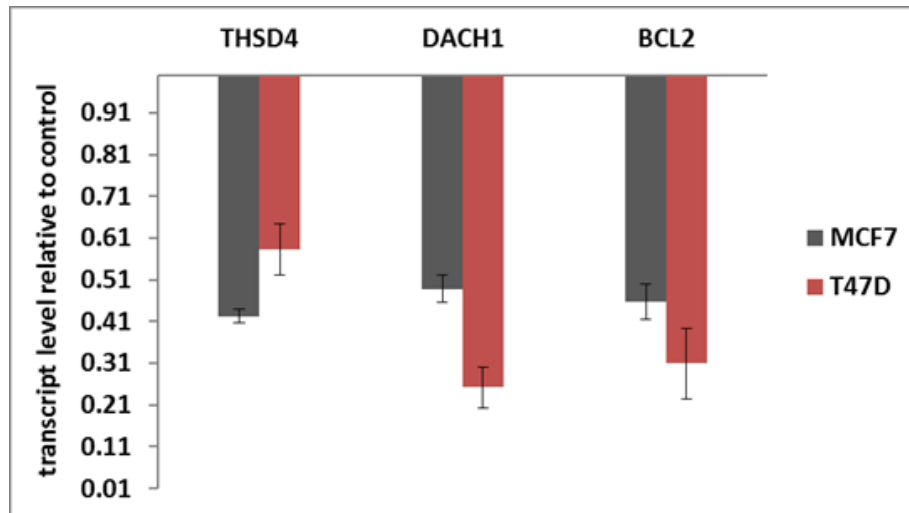

Supplement: MOESM3 [file 9781232]
